# Supplementary material for: Fabrication of Eco-Friendly Hydrolyzed Ethylene–Maleic Anhydride Copolymer–Avermectin Nanoemulsion with High Stability, Adhesion Property, pH, and Temperature-Responsive Releasing Behaviors
Source: MDPI journal article supplement (doi:10.3390/molecules29051148), 2024-03-05
Supplement: s1 [file s1]

# Fabrication of Eco-Friendly Hydrolyzed Ethylene–Maleic Anhydride Copolymer–Avermectin Nanoemulsion with High Stability, Adhesion Property, pH, and Temperature-Responsive Releasing Behaviors

Yuxin Cheng, Zeyu Pan, Liming Tang \*, Yanbin Huang and Wantai Yang

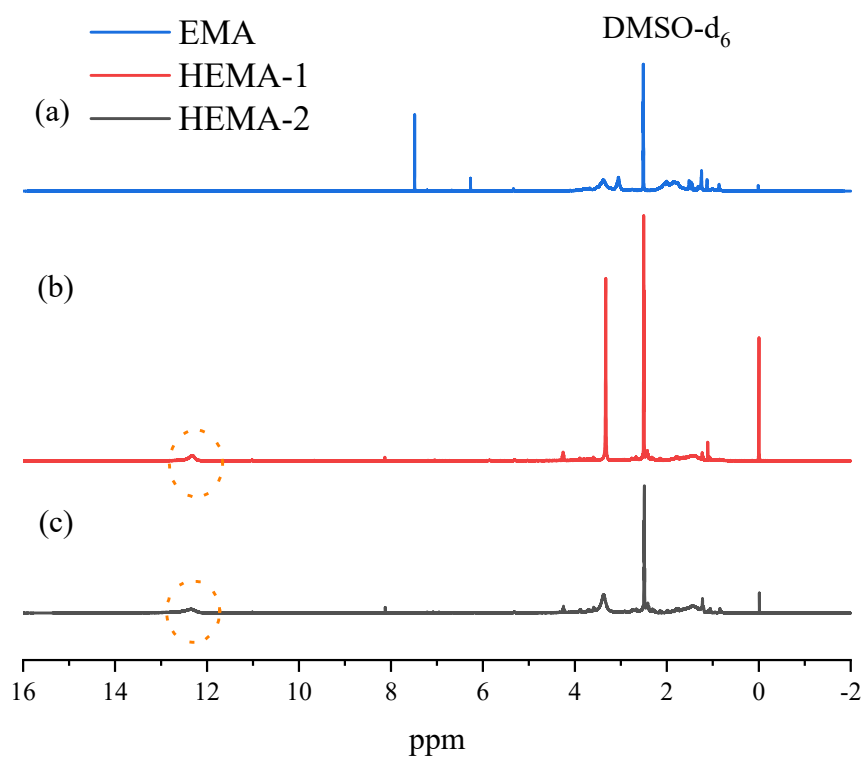

**Figure S1.** <sup>1</sup>H NMR spectra of (a) EMA, (b) HEMA-1, and (c) HEMA-2.

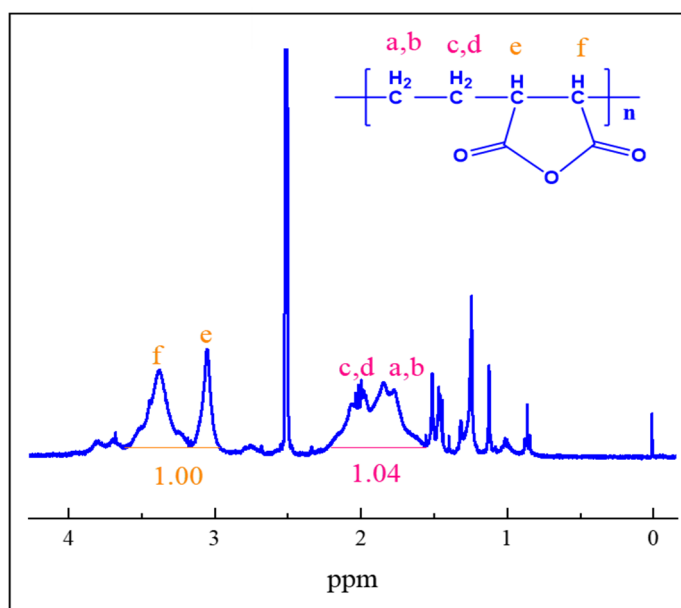

**Figure S2.** Local magnification <sup>1</sup>H NMR spectrum of EMA. The values under the peaks indicate the peak areas.

**Table S1.** Experimental matrix of Avm-nanoemulsion based on central composite design (CCD).

| Run | Independent Variables |       |       |    | Response Variables  |                    |                    |                    |                    |                    |
|-----|-----------------------|-------|-------|----|---------------------|--------------------|--------------------|--------------------|--------------------|--------------------|
|     | A (%)                 | B (%) | C (g) | D  | Y <sub>1</sub> (nm) |                    | Y <sub>2</sub> (%) |                    | Y <sub>3</sub> (%) |                    |
|     |                       |       |       |    | Mean                | standard deviation | Mean               | standard deviation | Mean               | standard deviation |
| 1   | 33.3                  | 0.47  | 0.50  | 1  | 298.70              | 4.0                | 44.64              | 2.61               | 52.52              | 3.34               |
| 2   | 33.3                  | 2.60  | 0.50  | 1  | 392.50              | 3.3                | 50.64              | 3.50               | 57.34              | 3.95               |
| 3   | 66.65                 | 0.47  | 2.25  | 3  | 389.60              | 3.9                | 65.72              | 3.49               | 57.93              | 2.61               |
| 4   | 33.3                  | 2.60  | 4.00  | 1  | 278.60              | 2.6                | 54.64              | 2.95               | 62.52              | 3.50               |
| 5   | 66.65                 | 0.47  | 2.25  | 3  | 198.80              | 3.5                | 69.34              | 4.01               | 55.93              | 3.44               |
| 6   | 33.3                  | 2.60  | 4.00  | 1  | 201.50              | 3.4                | 59.64              | 2.80               | 69.52              | 2.95               |
| 7   | 33.3                  | 0.47  | 0.50  | 5  | 325.70              | 2.9                | 49.64              | 4.20               | 57.23              | 4.03               |
| 8   | 66.65                 | 2.60  | 2.25  | -1 | 228.40              | 4.0                | 66.72              | 2.60               | 54.77              | 2.80               |
| 9   | 133.35                | 0.47  | 2.25  | 3  | 230.50              | 2.8                | 56.34              | 3.34               | 49.23              | 4.20               |
| 10  | 66.65                 | 2.60  | 2.25  | 3  | 188.80              | 4.2                | 67.56              | 4.55               | 55.93              | 3.44               |
| 11  | 100                   | 0.47  | 0.50  | 5  | 352.20              | 2.6                | 74.88              | 4.01               | 54.93              | 2.21               |
| 12  | -0.05                 | 2.60  | 2.25  | 3  | 245.20              | 3.3                | 53.21              | 2.80               | 54.44              | 4.13               |
| 13  | 33.3                  | 0.47  | 4.00  | 5  | 234.20              | 4.5                | 55.64              | 4.20               | 62.34              | 2.80               |

|    |       |      |      |   |        |     |       |      |       |      |
|----|-------|------|------|---|--------|-----|-------|------|-------|------|
| 14 | 100   | 2.60 | 4.00 | 1 | 303.10 | 4.2 | 77.88 | 2.60 | 57.93 | 4.20 |
| 15 | 100   | 0.47 | 0.50 | 1 | 360.30 | 4.1 | 74.23 | 3.34 | 56.90 | 2.60 |
| 16 | 33.3  | 2.60 | 4.00 | 5 | 205.90 | 3.6 | 60.6  | 4.55 | 67.24 | 3.87 |
| 17 | 66.65 | 0.47 | 2.25 | 3 | 157.30 | 3.0 | 65.3  | 4.21 | 55.33 | 4.52 |
| 18 | 100   | 2.60 | 0.50 | 5 | 230.50 | 4.1 | 75.8  | 4.11 | 59.02 | 4.21 |
| 19 | 66.65 | 0.47 | 1.25 | 3 | 333.50 | 3.7 | 69.2  | 3.56 | 57.23 | 4.10 |
| 20 | 66.65 | 2.60 | 2.25 | 3 | 198.80 | 3.4 | 68.3  | 3.07 | 59.89 | 4.10 |
| 21 | 66.65 | 0.47 | 2.25 | 3 | 198.80 | 4.2 | 66.4  | 4.10 | 56.22 | 3.60 |
| 22 | 100   | 2.60 | 4.00 | 1 | 198.40 | 4.3 | 74.6  | 3.70 | 56.90 | 3.70 |
| 23 | 66.65 | 0.47 | 5.75 | 3 | 168.30 | 2.9 | 67.3  | 3.60 | 54.99 | 3.49 |
| 24 | 66.65 | 2.60 | 2.25 | 7 | 202.90 | 3.5 | 68.9  | 3.45 | 54.34 | 4.21 |
| 25 | 33.3  | 0.47 | 0.50 | 5 | 287.60 | 3.7 | 45.3  | 4.10 | 51.87 | 3.72 |
| 26 | 100   | 2.60 | 0.50 | 1 | 235.80 | 2.4 | 77.2  | 3.70 | 58.21 | 2.55 |
| 27 | 100   | 0.47 | 4.00 | 5 | 275.30 | 3.2 | 75.2  | 3.49 | 57.89 | 3.56 |
| 28 | 66.65 | 2.60 | 2.25 | 3 | 198.80 | 3.2 | 69.7  | 4.21 | 55.90 | 3.78 |
| 29 | 100   | 0.47 | 4.00 | 5 | 202.30 | 4.2 | 72.3  | 4.33 | 56.78 | 2.75 |
| 30 | 66.65 | 2.60 | 0.50 | 3 | 198.80 | 4.0 | 69.2  | 2.95 | 55.67 | 3.63 |

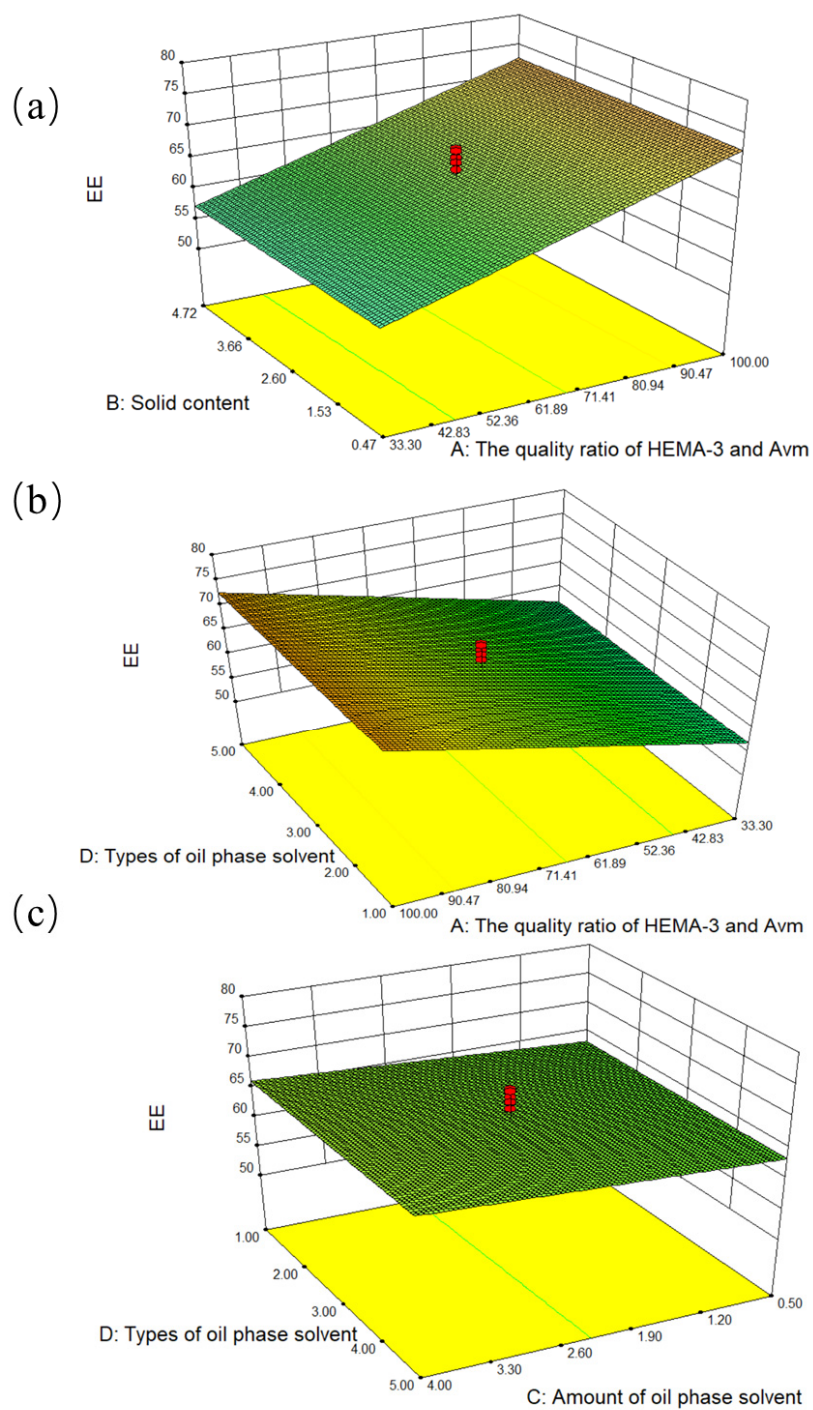

**Figure S3.** Response surface and contour plots of the interactions between (a) A vs. B, (b) A vs. D, and (c) C vs. D on the EE of Avm-nanoemulsion.

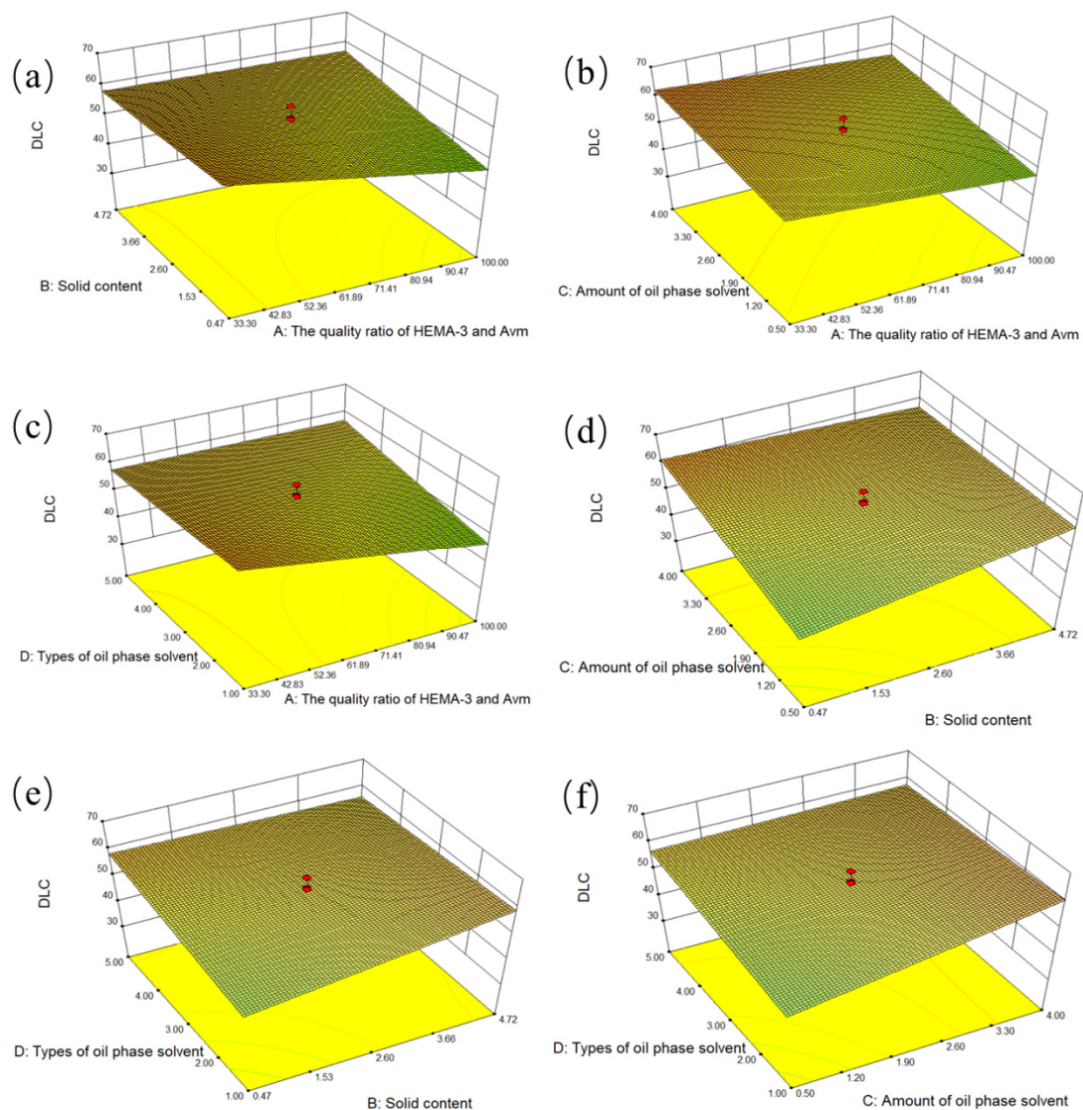

**Figure S4.** Response surface and contour plots of the interactions between (a) A vs. B, (b) A vs. C, (c) A vs. D, (d) B vs. C, (e) B vs. D, and (f) C vs. D on the DLC of Avm-nanoemulsion.

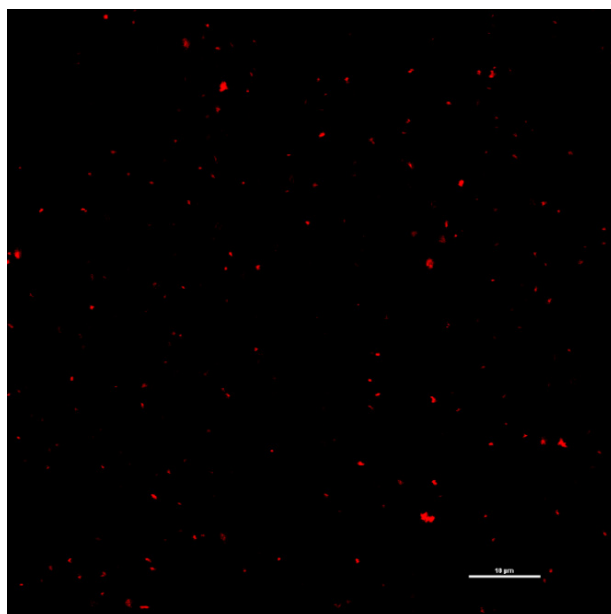

**Figure S5.** Confocal laser scanning microscopic image of Avm@HEMA with Nile red labeled.

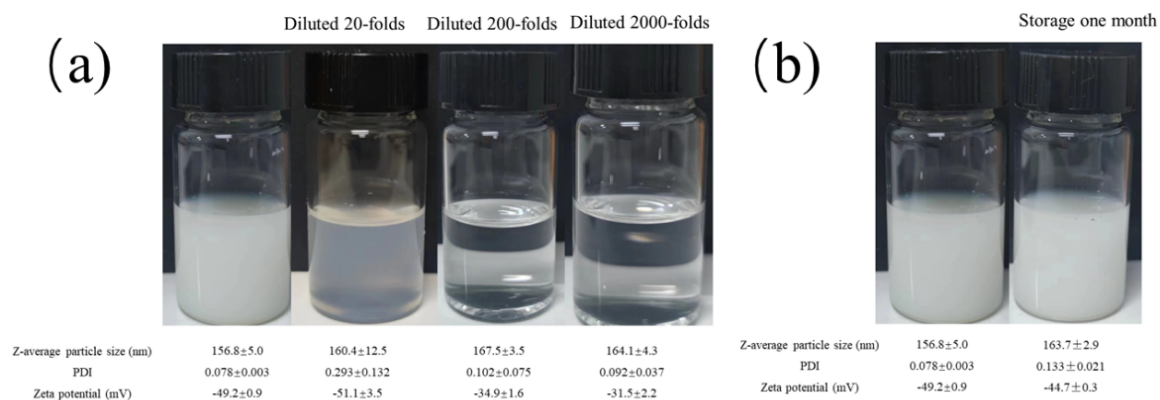

**Figure S6.** (a) Appearance, Z-average particle size, PDI, and Zeta potential of Avm@HEMA before and after dilution, (b) Appearance, Z-average particle size, PDI, and Zeta potential of Avm@HEMA before and after storage for one month.

**Table S2.** The Z-average particle size, PDI, Zeta potential, encapsulation efficiency (EE) and drug loading capacity (DLC) over time of Avm@HEMA.

| Time/day | Z-average particle size | PDI         | Zeta potential | encapsulation efficiency (EE)/% | drug loading capacity (DLC)/% |
|----------|-------------------------|-------------|----------------|---------------------------------|-------------------------------|
| 0        | 156.8±5.0               | 0.115±0.003 | -47.8±0.9      | 69.72±4.01                      | 54.93±1.12                    |
| 3        | 157.2±3.1               | 0.143±0.015 | -47.9±0.7      | 68.44±2.03                      | 52.77±2.31                    |
| 6        | 158.3±2.8               | 0.133±0.009 | -46.9±0.4      | 68.44±2.03                      | 52.22±0.53                    |
| 9        | 159.0±3.0               | 0.116±0.012 | -44.9±0.6      | 66.52±2.77                      | 50.54±1.70                    |
| 12       | 161.4±4.5               | 0.118±0.008 | -43.9±0.9      | 63.28±3.05                      | 49.83±1.77                    |
| 15       | 159.2±1.0               | 0.132±0.022 | -42.8±0.5      | 64.43±1.98                      | 51.93±0.79                    |
| 18       | 160.7±1.9               | 0.084±0.021 | -41.4±0.3      | 63.12±2.54                      | 52.54±1.30                    |
| 21       | 161.9±2.0               | 0.078±0.002 | -40.8±0.9      | 65.52±1.09                      | 52.67±1.44                    |
| 24       | 162.0±1.0               | 0.128±0.108 | -42.6±0.5      | 61.28±1.05                      | 51.63±0.55                    |
| 27       | 163.4±2.5               | 0.122±0.012 | -45.7±0.3      | 60.43±1.28                      | 50.89±1.39                    |
| 30       | 163.7±2.9               | 0.133±0.021 | -44.7±0.3      | 60.12±2.54                      | 50.54±1.34                    |

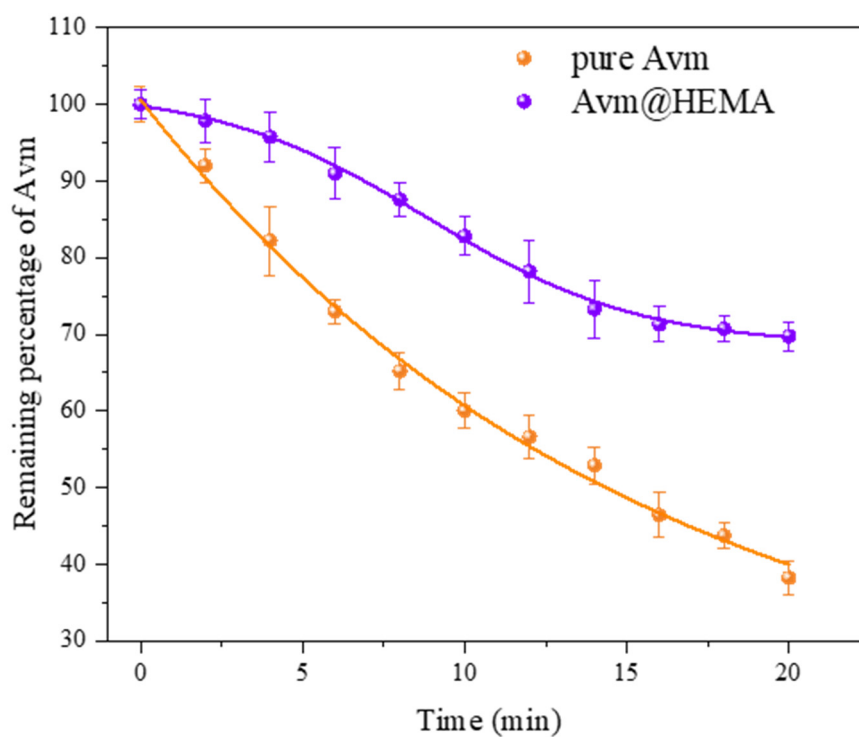

**Figure S7.** Remaining percentage of Avm at different irradiation time.

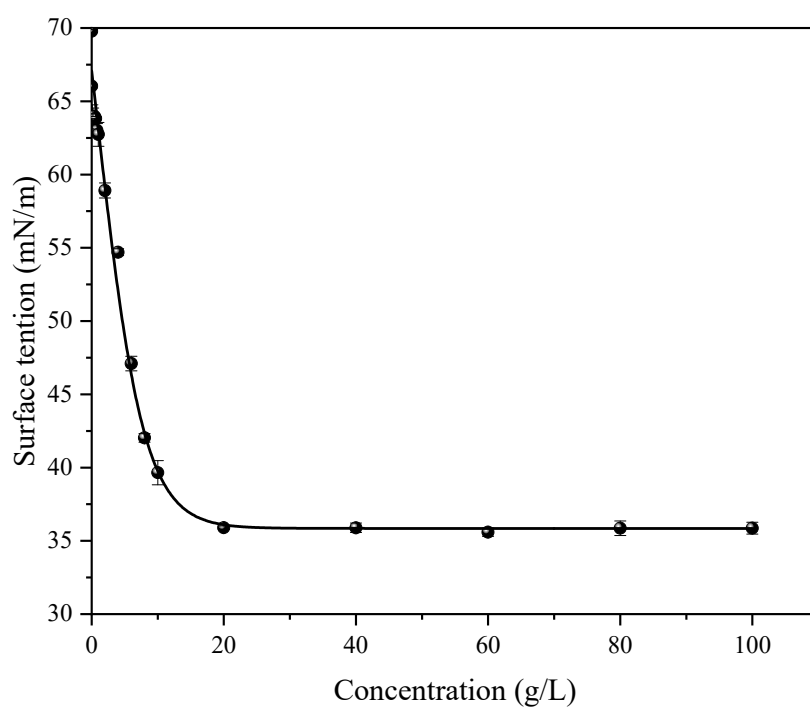

**Figure S8.** Surface tension at different concentrations of the HEMA-3 aqueous solution.

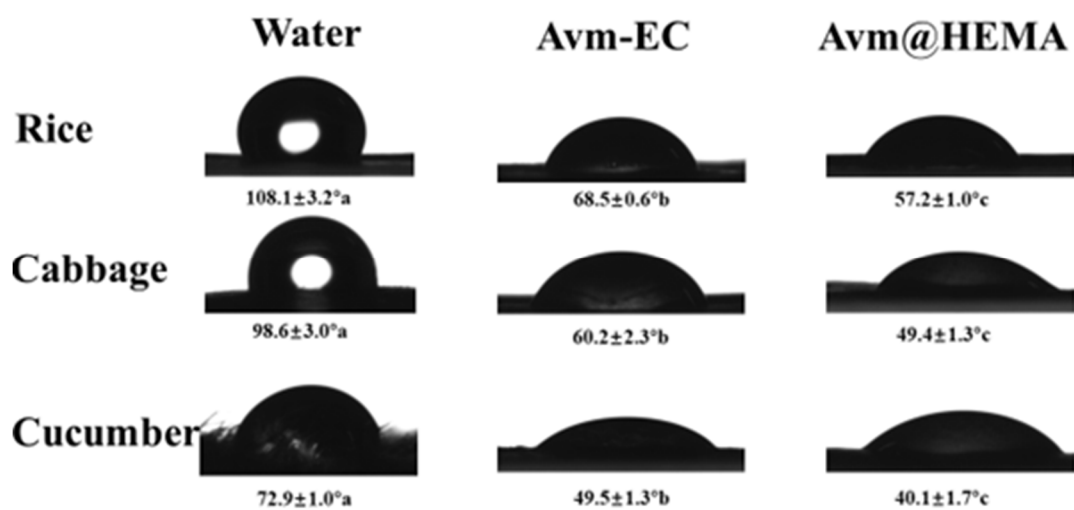

**Figure S9.** Contact angles of deionized water, Avm-EC, and Avm@HEMA on rice, cabbage, and cucumber leaves. (Values not sharing a common letter within the same row in each element indicate a significant difference,  $p < 0.05$ ).
